# Supplementary material
Source: PubMed Central journal article supplement (PMC5813832)
Supplement: NIHMS940345-supplement-supplement_1.pdf [file NIHMS940345-supplement-supplement_1.pdf]

1 **Supplemental Table . Hazard Ratios and 95% Confidence Intervals for Abdominal Aortic**  
 2 **Aneurysm According to Diabetes Mellitus (n=13,763), 1987–2013, ARIC.**

|                                             | Diabetes mellitus |                  |
|---------------------------------------------|-------------------|------------------|
|                                             | No                | Yes              |
| No. at risk                                 | 12,376            | 1,387            |
| Person-years                                | 251,143           | 23,911           |
| Death* rates per 1000 person-years (95% CI) | 13.9 (13.4–14.5)  | 19.3 (16.9–22.0) |
| Cases                                       | 485               | 33               |
| Model 1                                     | 1                 | 0.66 (0.46–0.94) |
| Model 2                                     | 1                 | 0.58 (0.41–0.83) |
| Model 3                                     | 1                 | 0.46 (0.32–0.66) |

3 Model 1: Adjusted for age, sex, and race/ARIC field center.

4 Model 2: Adjusted for Model 1 + adjusted for smoking status, pack-years of smoking, height,  
 5 hypertension, HDL and LDL cholesterol, and peripheral artery disease.

6 Model 3: Adjusted for Model2 + competing risk of death from underlying causes other than  
 7 abdominal aortic aneurysm.

8 \*Death from underlying causes other than abdominal aortic aneurysm.

9

10

11
